# Supplementary material for: Cholesteryl α-D-glucoside 6-acyltransferase enhances the adhesion of Helicobacter pylori to gastric epithelium
Source: PubMed Central journal article supplement (PMC7069968; doi:10.1038/s42003-020-0855-y), 2020-03-13
Supplement: 42003_2020_855_MOESM2_ESM.pdf [file 42003_2020_855_MOESM2_ESM.pdf]

**Supplementary Movie 1. Real time imaging of OMV-induced lipid raft clustering in AGS cells**

**Supplementary Movie 2. A schematic animation shows how CGAT is involved in *H. pylori* pathogenesis**

**Supplementary Data 1. Source data**

All source data in the main figures are available in Supplementary Data 1.

**Supplementary Data 2. Mass-based proteomics data**
